# Supplementary material
Source: publisher site journal article supplement (https://www.spandidos-publications.com/1526/downloadSupplementary)
Supplement: Supplementary file 1 [file downloadSupplementary]

Table S1. Survival time in the low and high expression groups of histone markers.

| Group                                 | Mean $\pm$ standard error<br>of the mean | 95% confidence<br>interval | P-value            | $\chi^2$ |
|---------------------------------------|------------------------------------------|----------------------------|--------------------|----------|
| Low H3K9me2                           | 42.521 $\pm$ 2.195                       | 38.219-46.823              | 0.028 <sup>a</sup> | 4.802    |
| High H3K9me2                          | 34.061 $\pm$ 3.861                       | 26.493-41.629              |                    |          |
| Low EHMT2                             | 41.761 $\pm$ 2.399                       | 37.059-46.463              | 0.030 <sup>a</sup> | 4.736    |
| High EHMT2                            | 32.243 $\pm$ 3.364                       | 25.650-38.837              |                    |          |
| Low expression of both markers group  | 46.000 $\pm$ 2.711                       | 40.686-51.314              | 0.036 <sup>a</sup> | 6.623    |
| High expression of both markers group | 31.467 $\pm$ 5.671                       | 20.352-42.582              |                    |          |
| Other groups                          | 37.943 $\pm$ 2.830                       | 32.396-43.491              |                    |          |

<sup>a</sup>P<0.05. H3K9me2, di-methylated lysine 9 of histone H3; EHMT2, euchromatic histone lysine methyltransferase 2.

Table SII. Univariate Kaplan-Meier survival analysis between clinicopathologic variables and histone marks in the patients with gastric cancer.

| Characteristics                  | Percentage (%) | $\chi^2$ | P-value             |
|----------------------------------|----------------|----------|---------------------|
| Sex                              |                |          |                     |
| Male                             | 36.59          | 0.005    | 0.943               |
| Female                           | 36.11          |          |                     |
| Age (years)                      |                |          |                     |
| ≤60                              | 35.59          | 0.234    | 0.629               |
| >60                              | 37.29          |          |                     |
| Differentiation degree           |                |          |                     |
| Well + moderately differentiated | 58.93          | 23.920   | <0.001 <sup>b</sup> |
| Poorly differentiated            | 16.13          |          |                     |
| Lymph node metastasis            |                |          |                     |
| Negative                         | 70.59          | 60.853   | <0.001 <sup>b</sup> |
| Positive                         | 10.45          |          |                     |
| Distal metastasis                |                |          |                     |
| Negative                         | 39.09          | 60.853   | <0.001 <sup>b</sup> |
| Positive                         | 0.00           |          |                     |
| pTNM                             |                |          |                     |
| I+II                             | 65.08          | 96.266   | <0.001 <sup>b</sup> |
| III+IV                           | 3.64           |          |                     |
| H3K9me2                          |                |          |                     |
| Low                              | 39.51          | 4.802    | 0.028 <sup>a</sup>  |
| High                             | 29.73          |          |                     |
| EHMT2                            |                |          |                     |
| Low                              | 37.84          | 4.736    | 0.030 <sup>a</sup>  |
| High                             | 34.09          |          |                     |

<sup>a</sup>P<0.05, <sup>b</sup>P<0.001. H3K9me2, di-methylated lysine 9 of histone H3; EHMT2, euchromatic histone lysine methyltransferase 2.
